# Supplementary material
Source: PubMed Central journal article supplement (PMC7964554)
Supplement: 3513_table.pdf [file 3513_table.pdf]

**On-line Table: Details of included MRI studies, scanned at >35 weeks' postmenstrual age**

| MRI Modality                 |                                  | Population          | Timing of MRI (wk)                                                             | Main Findings                                                                                                                                                                                                    |
|------------------------------|----------------------------------|---------------------|--------------------------------------------------------------------------------|------------------------------------------------------------------------------------------------------------------------------------------------------------------------------------------------------------------|
| Structural conventional      | Sie et al <sup>52</sup>          | 43 Infants <37 wks  | 36                                                                             | Severe WM abnormalities had a PPV of 85%–100% for PDI <sup>a</sup> <70 at 18 mos and 100% PPV for the development of CP                                                                                          |
|                              | Skiöld et al <sup>42</sup>       | 117 Infants <27 wks | 38–41                                                                          | Moderate/severe WM abnormalities were related to neurodevelopment <sup>a</sup> at 30 mos; PPV for the development of CP was 50%; patients with DEHSI had normal outcome <sup>a</sup>                             |
|                              | Jeon et al <sup>10</sup>         | 126 Infants <32 wks | 37                                                                             | Cystic PVL and PWML were significantly related to CP; DEHSI was not related to adverse neurodevelopment <sup>a</sup> at 24 mos                                                                                   |
|                              | Iwata et al <sup>59</sup>        | 76 Infants <32 wks  | 38–42                                                                          | WM injury predicted low full-scale IQ (OR, 8.3), CP (OR, 10.0), and requirements for special assistance at school (OR, 7.0) at 9 yrs; DEHSI and GM abnormalities were not associated with impaired outcome       |
|                              | Woodward et al <sup>57</sup>     | 110 Infants <32 wks | Term                                                                           | Extent of WM abnormalities were significantly related to executive-function ability at 4 yrs                                                                                                                     |
|                              | Spittle et al <sup>45</sup>      | 227 Infants <30 wks | 38–42                                                                          | Severity of WM abnormalities was related to proportion of severe motor impairment at 5 yrs; mild WM abnormalities had an OR of 5.6 for severe motor impairment                                                   |
|                              | Kidokoro et al <sup>63</sup>     | 160 Infants <30 wks | 40                                                                             | DEHSI was not related to neurodevelopmental outcome <sup>a</sup> at 24 mos                                                                                                                                       |
|                              | Hart et al <sup>51</sup>         | 67 Infants <35 wks  | 37–44                                                                          | Overt abnormalities were related to neurodevelopmental outcome <sup>a</sup> at 18 mos; DEHSI was not related to abnormal outcome                                                                                 |
|                              | de Bruïne et al <sup>62</sup>    | 110 Infants <32 wks | 40–44                                                                          | PWML (OR, 18.38) and ventricular dilation (OR, 4.57) predicted motor delay at 24 mos; PWML was also related to MDI <sup>a</sup> at 24 mos; DEHSI was not related to abnormal outcome                             |
|                              | Munck et al <sup>53</sup>        | 180 Infants <1500 g | Term                                                                           | Major cerebral abnormalities were significantly correlated to decreased outcome <sup>a</sup> at 24 mos                                                                                                           |
|                              | De Vries et al <sup>67</sup>     | 12 Infants <36 wks  | 40                                                                             | Asymmetric PLIC caused by venous infarction predicted future hemiplegia                                                                                                                                          |
|                              | Lind et al <sup>69</sup>         | 5 Infants <1500 g   | Term                                                                           | Caudothalamic cysts were not correlated to neurodevelopmental outcome <sup>a</sup> at 24 mos or intelligence at 5 yrs                                                                                            |
|                              | Hnатыzyn et al <sup>43</sup>     | 23 Infants <36 wks  | 38–40                                                                          | Asphyxiated brain injury was correlated to the development of CP at 24 mos                                                                                                                                       |
|                              | Clark and Woodward <sup>58</sup> | 103 Infants <33 wks | 40                                                                             | Severity of brain injury (WM > GM) was strongly related to working memory at 6 yrs                                                                                                                               |
|                              | Spittle et al <sup>55</sup>      | 188 Infants <30 wks | 38–42                                                                          | WM abnormalities were associated with lower social-emotional competence at 24 mos                                                                                                                                |
|                              | Spittle et al <sup>44</sup>      | 86 Infants <30 wks  | 38–44                                                                          | WM abnormalities were associated with motor outcome at 12 mos                                                                                                                                                    |
|                              | Brown et al <sup>47</sup>        | 168 Infants <30 wks | 38–42                                                                          | WM and GM abnormalities were correlated strongly to neurobehavioral performance at term age                                                                                                                      |
|                              | Spittle et al <sup>9</sup>       | 86 Infants <30 wks  | 38–44                                                                          | Severity of WM abnormalities was related to abnormal general movement at 1 and 3 mos                                                                                                                             |
|                              | Reidy et al <sup>60</sup>        | 198 Infants <30 wks | Term                                                                           | WM abnormalities predicted several language abilities at 7 yrs                                                                                                                                                   |
|                              | Edgin et al <sup>56</sup>        | 100 Infants <33 wks | 39–41                                                                          | Mild and moderate/severe WM abnormalities were correlated to lower executive-functioning performance at 2 and 4 yrs                                                                                              |
|                              | Nanba et al <sup>46</sup>        | 289 Infants <34 wks | 36–43                                                                          | PWML in the corona radiata above the PLIC were correlated to gross motor functions at 3–5 yrs                                                                                                                    |
|                              | Iwata et al <sup>61</sup>        | 210 Infants <36 wks | Term                                                                           | Subtle WM injury was significantly related to full-scale IQ at 6 yrs                                                                                                                                             |
|                              | Woodward et al <sup>15</sup>     | 167 Infants <30 wks | 38–42                                                                          | Increasing severity of WM abnormalities was associated with lower outcome <sup>a</sup> at 24 mos                                                                                                                 |
| Mirmiran et al <sup>16</sup> | 61 Infants <30 wks               | 36–40               | PPV of brain lesions was 60% for the development of CP at 31 mos               |                                                                                                                                                                                                                  |
| Valkama et al <sup>17</sup>  | 50 Infants <34 wks               | 39                  | Parenchymal lesions predicted CP at 18 mos; sensitivity, 82%; specificity, 97% |                                                                                                                                                                                                                  |
| DTI                          | Aida et al <sup>48</sup>         | 15 Infants <33 wks  | 35–45                                                                          | Parenchymal lesions predicted CP at 12 mos                                                                                                                                                                       |
|                              | van Kooij et al <sup>72</sup>    | 64 Infants <31 wks  | 40–45                                                                          | At 24 mos, PDI <sup>a</sup> was correlated to FA in the CC; fine-motor performance, <sup>a</sup> to FA in the major WM tracts; and gross motor performance, <sup>a</sup> to FA in the PLIC, fornix, and thalamus |
|                              | van Kooij et al <sup>74</sup>    | 69 Infants <31 wks  | 40–45                                                                          | At 24 mos, PDI <sup>a</sup> was correlated to volume and length of the CC and right PLIC in girls; fine-motor performance <sup>a</sup> was correlated to volume and FA of the left PLIC in boys                  |
|                              | Kaukola et al <sup>77</sup>      | 30 Infants <32 wks  | 38–42                                                                          | Higher ADC in the corona radiata was associated with poorer gross-motor outcome <sup>b</sup> at 24 mos                                                                                                           |

**On-line Table: (Continued)**

| MRI Modality                  |                                 | Population                | Timing of MRI (wk) | Main Findings                                                                                                                                                                        |
|-------------------------------|---------------------------------|---------------------------|--------------------|--------------------------------------------------------------------------------------------------------------------------------------------------------------------------------------|
| DTI                           | Rose et al <sup>78</sup>        | 78 Infants <32 wks        | 33–42              | Neurodevelopmental outcome at 18 mos <sup>a</sup> was correlated to FA of the right PLIC                                                                                             |
|                               | Bassi et al <sup>80</sup>       | 37 Infants <33 wks        | 39–43              | FA of the optic radiation was correlated with visual function at term-equivalent age                                                                                                 |
|                               | Krishnan et al <sup>73</sup>    | 38 Infants <34 wks        | 38–44              | Without focal brain injury, lower ADC in the WM was correlated to developmental outcome <sup>b</sup> at 24 mos                                                                       |
|                               | Arzoumanian et al <sup>79</sup> | 63 Infants <34 wks        | 34–42              | FA in the PLIC was reduced in infants with abnormal neurologic examination findings at 24 mos                                                                                        |
|                               | Rogers et al <sup>75</sup>      | 111 Infants <30 wks       | 37–43              | Higher ADC in the orbitofrontal cortex was correlated to social-emotional problems at 5 yrs                                                                                          |
| Volumetric                    | Boardman et al <sup>76</sup>    | 80 Infants ≤34 wks        | 38–44              | Decreased development <sup>b</sup> was associated with decreased tissue reduction of WM and deep GM                                                                                  |
|                               | Jary et al <sup>66</sup>        | 25 Infants <30 wks        | 38–47              | In infants with PHVD, total cerebral volume was correlated to MDI <sup>a</sup> and PDI <sup>a</sup> at 24 mos; thalamic and cerebellar volume were correlated to PDI <sup>a</sup>    |
|                               | Tich et al <sup>97</sup>        | 182 Infants <30 wks       | 40                 | Biparietal diameter was correlated to neurodevelopmental outcome <sup>a</sup> at 24 mos                                                                                              |
|                               | Maunu et al <sup>96</sup>       | 225 Infants <1500 g       | Term               | Ventricular dilation with additional brain pathology was associated with CP and outcome <sup>a</sup> at 24 mos                                                                       |
|                               | Lind et al <sup>86</sup>        | 164 Infants <1500 g       | Term               | PDI <sup>a</sup> and MDI <sup>a</sup> scores at 24 mos <70 was associated with larger ventricles and lower volume of cerebrum, cerebellum, frontal lobe, basal ganglia, and thalamus |
|                               | Spittle et al <sup>98</sup>     | 83 Infants <30 wks        | 38–40              | Reduced cerebellar diameter was correlated to abnormal general movement at 3 mos                                                                                                     |
|                               | Lind et al <sup>87</sup>        | 97 Infants <1500 g        | Term               | Reduced cerebellar volume was associated with poorer executive functions and motor skills at 5 yrs                                                                                   |
|                               | Thompson et al <sup>93</sup>    | 184 Infants <30 wks       | 38–42              | Reduced hippocampal volume was related to neurodevelopmental outcome <sup>a</sup> at 24 mos                                                                                          |
|                               | Tan et al <sup>85</sup>         | 65 Infants <29 wks        | 40–43              | Total brain volume was correlated to MDI <sup>a</sup> at 9 mos                                                                                                                       |
|                               | Beauchamp et al <sup>94</sup>   | 156 Infants <30 wks       | 38–42              | Reduced hippocampal volume was related to working memory deficits at 24 mos                                                                                                          |
|                               | Shah et al <sup>92</sup>        | 68 Infants <33 wks        | Term               | Inferior occipital brain regions were correlated to impaired oculomotor-function control at 24 mos                                                                                   |
|                               | Shah et al <sup>88</sup>        | 83 Infants <32 wks        | 38–43              | Reduced cerebellar volume was associated with WM injury and outcome <sup>a</sup> at 24 mos                                                                                           |
|                               | Woodward et al <sup>54</sup>    | 92 Infants <32 wks        | 39–41              | After correcting for WM injury, total brain volume was correlated to object working memory at 24 mos                                                                                 |
|                               | Inder et al <sup>28</sup>       | 119 Infants <33 wks       | 39–41              | Decreased cortical and deep GM volumes and increased CSF volumes were correlated to neurodevelopmental disability at 12 mos                                                          |
|                               | Peterson et al <sup>90</sup>    | 10 Infants <37 wks        | 35                 | Sensorimotor and midtemporal WM volumes were correlated strongly with outcome <sup>a</sup> at 20 mos                                                                                 |
|                               | Valkama et al <sup>95</sup>     | 51 Infants <34 wks        | Term               | Reduced brain stem volume was associated with neurosensory disability at 18 mos                                                                                                      |
|                               | H-MRS                           | Gadin et al <sup>91</sup> | 38 Infants <30 wks | 36                                                                                                                                                                                   |
| van Kooij et al <sup>89</sup> |                                 | 112 Infants <31 wks       | 39–45              | Cerebellar volume and cerebellar NAA/Cho ratio were positively correlated to MDI <sup>a</sup> at 24 mos                                                                              |

**Note:**—PHVD indicates posthemorrhagic ventricular dilation; CP, cerebral palsy; OR, odds ratio; PPV, positive predictive value; CC, corpus callosum; GM, gray matter; PDI, Psychomotor Development Index; MDI, Mental Development Index; PVL, periventricular leukomalacia.

<sup>a</sup> Bayley Scales of Infant Development.

<sup>b</sup> Griffiths Mental Developmental Scales.
